# Supplementary material for: Polymorphisms in CLDN1 are associated with age and differentiation of triple-negative breast cancer patients
Source: PubMed Central journal article supplement (PMC6481238; doi:10.1042/bsr20181952), 2019-04-23
Supplement: bsr20181952_Supp1.pdf [file bsr20181952_Supp1.pdf]

**Supplementary Table 1. Relationship between genotypes and clinicopathological features**

| Variables         | Age |     |          | Grade |    |          | Tumor size |      |          | Lymph node status |          |          | Vascular invasion |          |          |
|-------------------|-----|-----|----------|-------|----|----------|------------|------|----------|-------------------|----------|----------|-------------------|----------|----------|
|                   | ≤50 | >50 | <i>P</i> | 1-2   | 3  | <i>P</i> | ≤2cm       | >2cm | <i>P</i> | negative          | positive | <i>P</i> | negative          | positive | <i>P</i> |
| <b>rs10513846</b> |     |     |          |       |    |          |            |      |          |                   |          |          |                   |          |          |
| GG                | 52  | 18  | 1(Ref)   | 40    | 30 | 1(Ref)   | 35         | 35   | 1(Ref)   | 44                | 26       | 1(Ref)   | 66                | 4        | 1(Ref)   |
| GA                | 79  | 61  | 0.013    | 65    | 75 | 0.144    | 68         | 72   | 0.845    | 80                | 60       | 0.428    | 130               | 10       | 0.696    |
| AA                | 33  | 24  | 0.053    | 18    | 39 | 0.005    | 20         | 37   | 0.093    | 35                | 22       | 0.867    | 54                | 3        | 0.912    |
| <b>rs1155884</b>  |     |     |          |       |    |          |            |      |          |                   |          |          |                   |          |          |
| AA                | 91  | 53  | 1(Ref)   | 67    | 77 | 1(Ref)   | 65         | 79   | 1(Ref)   | 94                | 50       | 1(Ref)   | 137               | 7        | 1(Ref)   |
| AC                | 55  | 43  | 0.270    | 46    | 52 | 0.950    | 46         | 52   | 0.783    | 52                | 46       | 0.057    | 90                | 8        | 0.301    |
| CC                | 18  | 7   | 0.398    | 10    | 15 | 0.546    | 12         | 13   | 0.791    | 13                | 12       | 0.207    | 23                | 2        | 0.523    |
| <b>rs8298</b>     |     |     |          |       |    |          |            |      |          |                   |          |          |                   |          |          |
| CC                | 99  | 58  | 1(Ref)   | 71    | 86 | 1(Ref)   | 69         | 88   | 1(Ref)   | 95                | 62       | 1(Ref)   | 148               | 9        | 1(Ref)   |
| CT                | 48  | 35  | 0.430    | 39    | 44 | 0.794    | 41         | 42   | 0.421    | 48                | 35       | 0.688    | 77                | 6        | 0.649    |
| TT                | 17  | 10  | 0.993    | 13    | 14 | 0.778    | 13         | 14   | 0.685    | 16                | 11       | 0.902    | 25                | 2        | 0.735    |
| <b>rs9842214</b>  |     |     |          |       |    |          |            |      |          |                   |          |          |                   |          |          |
| CC                | 104 | 63  | 1(Ref)   | 75    | 92 | 1(Ref)   | 72         | 95   | 1(Ref)   | 100               | 67       | 1(Ref)   | 156               | 11       | 1(Ref)   |
| CT                | 53  | 37  | 0.595    | 45    | 45 | 0.436    | 48         | 42   | 0.118    | 53                | 37       | 0.877    | 85                | 5        | 0.744    |
| TT                | 7   | 3   | 0.625    | 3     | 7  | 0.363    | 3          | 7    | 0.420    | 6                 | 4        | 0.994    | 9                 | 1        | 0.679    |
| <b>rs9283658</b>  |     |     |          |       |    |          |            |      |          |                   |          |          |                   |          |          |
| CC                | 40  | 31  | 1(Ref)   | 26    | 45 | 1(Ref)   | 29         | 42   | 1(Ref)   | 41                | 30       | 1(Ref)   | 67                | 4        | 1(Ref)   |
| CT                | 79  | 55  | 0.718    | 62    | 72 | 0.185    | 63         | 71   | 0.398    | 80                | 54       | 0.787    | 125               | 9        | 0.762    |
| TT                | 45  | 17  | 0.053    | 35    | 27 | 0.023    | 31         | 31   | 0.291    | 38                | 24       | 0.678    | 58                | 4        | 0.843    |
